# Supplementary material for: Impact of Weight on Clinical Outcomes of Edoxaban Therapy in Atrial Fibrillation Patients Included in the ETNA-AF-Europe Registry
Source: MDPI journal article supplement (doi:10.3390/jcm10132879), 2021-06-29
Supplement: s1 [file s1]

**Table S1.** Baseline demographics and clinical characteristics of patients included in ETNA-AF-Europe according to additional body weight categories.

|                                                   | ETNA-AF EU        | Body Weight [kg]  |                   |                      |                      |
|---------------------------------------------------|-------------------|-------------------|-------------------|----------------------|----------------------|
|                                                   | Total             | <50 kg            | ≥50 and ≤60 kg    | >100 and ≤120 kg     | >120 kg              |
| Patients, N (%)                                   | 13,092<br>(100%)  | 152<br>(1.2%)     | 1158<br>(9.1%)    | 1159<br>(9.1%)       | 287<br>(2.3%)        |
| Female, n (%)                                     | 5661 (43.2%)      | 139 (91.4%)       | 1006 (86.9%)      | 253 (21.8%)          | 70 (24.4%)           |
| Age, years                                        |                   |                   |                   |                      |                      |
| mean ± SD                                         | 73.6 ± 9.46       | 78.3 ± 9.71       | 78.5 ± 8.49       | 67.5 ± 9.43          | 62.7 ± 9.62          |
| median (Q1; Q3)                                   | 75 (68; 80)       | 80 (72; 85)       | 79 (74; 84)       | 68 (62; 74)          | 63 (57; 69)          |
| < 65 years                                        | 1994 (15.2%)      | 9 (5.9%)          | 60 (5.2%)         | 390 (33.7%)          | 151 (52.6%)          |
| [65; 75]                                          | 4456 (34.0%)      | 35 (23.0%)        | 268 (23.1%)       | 496 (42.8%)          | 105 (36.6%)          |
| [75; 85]                                          | 5268 (40.2%)      | 68 (44.7%)        | 550 (47.5%)       | 259 (22.4%)          | 30 (10.5%)           |
| ≥ 85 years                                        | 1372 (10.5%)      | 40 (26.3%)        | 280 (24.2%)       | 13 (1.1%)            | 1 (3.4%)             |
| Body weight, kg (min, max)                        | (38.0, 193.0)     | (38.0, 49.0)      | (50.0, 60.0)      | (10.0, 120.0)        | (121.0, 193.0)       |
| mean ± SD                                         | 81.0 ± 17.29      | 45.8 ± 2.88       | 56.2 ± 3.26       | 108.5 ± 5.60         | 135.0 ± 14.02        |
| median (Q1; Q3)                                   | 80.0 (70.0; 90.0) | 47.0 (44.0; 48.0) | 57.0 (54.0; 56.0) | 107.0 (104.0; 113.0) | 130.0 (125.0; 140.0) |
| ≤ 60 kg                                           | 1310 (10.3%)      | 152 (100.0%)      | 1158 (100.0%)     | 0 (0.0%)             | 0 (0.0%)             |
| (60; 80]                                          | 5565 (43.9%)      | 0 (0.0%)          | 0 (0.0%)          | 0 (0.0%)             | 0 (0.0%)             |
| (80; 100]                                         | 4346 (34.3%)      | 0 (0.0%)          | 0 (0.0%)          | 0 (0.0%)             | 0 (0.0%)             |
| > 100 kg                                          | 0 (0.0%)          | 0 (0.0%)          | 0 (0.0%)          | 253 (100.0%)         | 287 (100.0%)         |
| BMI, kg/m <sup>2</sup> (min, max)                 | (13.8, 68.6)      | (13.8, 24.8)      | (16.7, 28.5)      | (24.0, 51.1)         | (30.6, 68.6)         |
| mean ± SD                                         | 28.1 ± 5.11       | 18.8 ± 1.85       | 22.1 ± 2.10       | 35.1 ± 3.99          | 42.6 ± 5.84          |
| median (Q1; Q3)                                   | 27.3 (24.7; 30.7) | 18.7 (17.8; 19.7) | 22.0 (20.7; 23.4) | 34.5 (32.3; 37.2)    | 41.5 (38.6; 45.5)    |
| <18.5 kg/m <sup>2</sup>                           | 115 (0.9%)        | 67 (45.0%)        | 43 (3.8%)         | 0 (0.0%)             | 0 (0.0%)             |
| [18.5; 25]                                        | 3341 (26.7%)      | 82 (55.0%)        | 984 (86.3%)       | 1 (0.1%)             | 0 (0.0%)             |
| [25; 30]                                          | 5377 (42.9%)      | 0 (0.0%)          | 113 (9.9%)        | 81 (7.1%)            | 0 (0.0%)             |
| [30; 35]                                          | 2544 (20.3%)      | 0 (0.0%)          | 0 (0.0%)          | 551 (48.3%)          | 15 (5.2%)            |
| [35; 40]                                          | 792 (6.3%)        | 0 (0.0%)          | 0 (0.0%)          | 377 (33.0%)          | 87 (30.4%)           |
| ≥ 40 kg/m <sup>2</sup>                            | 352 (2.8%)        | 0 (0.0%)          | 0 (0.0%)          | 132 (11.6%)          | 184 (64.3%)          |
| ≥ 30 kg/m <sup>2</sup>                            | 3688 (29.5%)      | 0 (0.0%)          | 0 (0.0%)          | 1060 (92.8%)         | 286 (100.0%)         |
| CrCl (recalc.), mL/min,                           |                   |                   |                   |                      |                      |
| mean ± SD                                         | 74.3 ± 30.42      | 42.6 ± 16.84      | 49.5 ± 17.16      | 108.3 ± 32.4         | 142.6 ± 46.92        |
| median (Q1; Q3)                                   | 69.8 (53.0; 89.6) | 39.6 (30.4; 54.2) | 48.0 (37.8; 59.2) | 106.5 (85.5; 128.5)  | 141.0 (108.4; 169.8) |
| <15 mL/min                                        | 3 (0.0%)          | 0 (0.0%)          | 0 (0.0%)          | 0 (0.0%)             | 0 (0.0%)             |
| [15; 30]                                          | 288 (2.5%)        | 35 (24.1%)        | 106 (9.9%)        | 0 (0.0%)             | 0 (0.0%)             |
| [30; 50]                                          | 2103 (18.5%)      | 71 (49.0%)        | 484 (45.2%)       | 19 (1.8%)            | 21 (1.6%)            |
| [50; 80]                                          | 4876 (42.8%)      | 35 (24.1%)        | 429 (40.1%)       | 174 (17.0%)          | 187 (14.6%)          |
| ≥ 80 mL/min                                       | 4112 (36.1%)      | 4 (2.8%)          | 52 (4.9%)         | 832 (81.2%)          | 1069 (83.7%)         |
| CHADS <sub>2</sub> (recalc.),                     |                   |                   |                   |                      |                      |
| mean ± SD                                         | 1.7 ± 1.07        | 1.79 ± 1.13       | 1.9 ± 1.08        | 1.6 ± 0.97           | 1.5 ± 0.87           |
| median (Q1; Q3)                                   | 2 (1; 2)          | 2 (1; 2)          | 2 (1; 2)          | 1 (1; 2)             | 1 (1; 2)             |
| 0                                                 | 1365 (10.4%)      | 17 (11.2%)        | 82 (7.1%)         | 125 (10.8%)          | 28 (9.8%)            |
| 1–2                                               | 9124 (69.7%)      | 107 (70.4%)       | 817 (70.6%)       | 859 (74.1%)          | 227 (79.1%)          |
| ≥ 3                                               | 2603 (19.9%)      | 28 (18.4%)        | 259 (22.4%)       | 175 (15.1%)          | 32 (11.1%)           |
| CHA <sub>2</sub> DS <sub>2</sub> -VASc (recalc.), |                   |                   |                   |                      |                      |
| mean ± SD                                         | 3.1 ± 1.40        | 3.7 ± 1.36        | 3.9 ± 1.29        | 2.6 ± 1.33           | 2.4 ± 1.29           |
| median (Q1; Q3)                                   | 3 (2; 4)          | 4 (3; 4)          | 4 (3; 5)          | 3 (2; 3)             | 2 (1; 3)             |
| 0                                                 | 290 (2.2%)        | 1 (0.7%)          | 1 (0.1%)          | 42 (3.6%)            | 12 (4.2%)            |
| 1                                                 | 1324 (10.1%)      | 3 (2.0%)          | 22 (1.9%)         | 200 (17.3%)          | 68 (23.8%)           |
| 2                                                 | 2802 (21.4%)      | 23 (15.1%)        | 120 (10.4%)       | 313 (27.0%)          | 84 (29.4%)           |
| 3                                                 | 3768 (28.8%)      | 36 (23.7%)        | 311 (26.9%)       | 331 (28.6%)          | 68 (23.8%)           |
| ≥ 4                                               | 4908 (37.5%)      | 89 (58.6%)        | 703 (60.8%)       | 272 (23.5%)          | 301 (18.9%)          |
| mod. HAS-BLED (recalc.),                          |                   |                   |                   |                      |                      |
| mean ± SD                                         | 2.5 ± 1.10        | 2.5 ± 1.13        | 2.6 ± 1.04        | 2.4 ± 1.09           | 2.1 ± 1.05           |
| median (Q1; Q3)                                   | 2 (2; 3)          | 2 (2; 3)          | 3 (2; 3)          | 2 (2; 3)             | 2 (1; 3)             |
| < 3                                               | 6711 (51.3%)      | 75 (49.3%)        | 541 (46.7%)       | 641 (55.3%)          | 188 (65.5%)          |
| ≥ 3                                               | 6381 (48.7%)      | 77 (50.7%)        | 617 (53.3%)       | 518 (44.7%)          | 99 (34.5%)           |
| Frailty *, n (%)                                  |                   |                   |                   |                      |                      |
| Yes                                               | 1392 (10.6%)      | 59 (38.8%)        | 282 (24.3%)       | 52 (4.5%)            | 14 (4.9%)            |
| No                                                | 10820 (82.7%)     | 85 (55.9%)        | 793 (68.5%)       | 1018 (87.9%)         | 252 (87.8%)          |

|                                                        | ETNA-AF EU<br>Total | Body Weight [kg] |                |                  |               |
|--------------------------------------------------------|---------------------|------------------|----------------|------------------|---------------|
|                                                        |                     | <50 kg           | ≥50 and ≤60 kg | >100 and ≤120 kg | >120 kg       |
| Patients, N (%)                                        | 13,092<br>(100%)    | 152<br>(1.2%)    | 1158<br>(9.1%) | 1159<br>(9.1%)   | 287<br>(2.3%) |
| Not known                                              | 878 (6.7%)          | 8 (5.3%)         | 83 (7.2%)      | 88 (7.6%)        | 21 (7.3%)     |
| Medical history, n (%)                                 |                     |                  |                |                  |               |
| Hypertension                                           | 10088 (77.1%)       | 97 (63.8%)       | 843 (72.8%)    | 963 (83.1%)      | 243 (84.7%)   |
| Diabetes                                               | 2879 (22.0%)        | 13 (8.6%)        | 186 (16.1%)    | 378 (32.6%)      | 109 (38.0%)   |
| Dys-/hyperlipidaemia                                   | 5626 (43.0%)        | 58 (38.2%)       | 429 (37.1%)    | 496 (42.8%)      | 114 (39.7%)   |
| Coronary heart disease                                 | 2738 (20.9%)        | 18 (11.8%)       | 202 (17.4%)    | 260 (22.4%)      | 48 (16.7%)    |
| Peripheral artery disease                              | 437 (3.3%)          | 5 (3.3%)         | 39 (3.4%)      | 36 (3.1%)        | 10 (3.5%)     |
| Congestive heart failure                               | 777 (5.9%)          | 19 (12.5%)       | 170 (14.7%)    | 184 (15.9%)      | 41 (14.3%)    |
| Myocardial infarction                                  | 560 (4.3%)          | 4 (2.6%)         | 53 (4.6%)      | 49 (4.2%)        | 8 (2.8%)      |
| TIA                                                    | 448 (3.4%)          | 7 (4.6%)         | 45 (3.9%)      | 28 (2.4%)        | 6 (2.1%)      |
| Hyper-/hypothyroidism                                  | 1611 (12.3%)        | 29 (19.1%)       | 175 (15.1%)    | 130 (11.2%)      | 33 (11.5%)    |
| Digestive tract disease                                | 1086 (8.3%)         | 19 (12.5%)       | 123 (10.6%)    | 73 (6.3%)        | 22 (7.7%)     |
| COPD                                                   | 1206 (9.2%)         | 18 (11.8%)       | 107 (9.2%)     | 104 (9.0%)       | 38 (13.2%)    |
| History of stroke & ICH, n (%)                         |                     |                  |                |                  |               |
| Ischaemic stroke                                       | 778 (5.9%)          | 13 (8.5%)        | 89 (7.7%)      | 40 (3.5%)        | 8 (2.8%)      |
| Intracranial haemorrhage                               | 62 (0.5%)           | 2 (1.3%)         | 6 (0.5%)       | 4 (0.4%)         | 0 (0.0%)      |
| History of bleeding, n (%)                             |                     |                  |                |                  |               |
| Major                                                  | 129 (1.0%)          | 3 (2.0%)         | 20 (1.7%)      | 11 (0.9%)        | 2 (0.7%)      |
| Major or CRNM                                          | 270 (2.1%)          | 5 (3.3%)         | 39 (3.4%)      | 24 (2.1%)        | 5 (1.7%)      |
| Current AF type, n (%)                                 |                     |                  |                |                  |               |
| Paroxysmal                                             | 7039 (53.9%)        | 90 (59.6%)       | 664 (57.5%)    | 571 (49.4%)      | 142 (49.8%)   |
| Persistent                                             | 3159 (24.2%)        | 32 (21.2%)       | 231 (20.0%)    | 337 (29.1%)      | 87 (30.5%)    |
| Long-standing persistent & Permanent                   | 2864 (21.9%)        | 29 (19.2%)       | 260 (22.5%)    | 249 (21.5%)      | 56 (19.6%)    |
| Patients fulfilling ≥1 dose adjustment criteria, n (%) | 3106 (23.7%)        | 152 (100.0%)     | 1158 (100.0%)  | 30 (2.6%)        | 5 (1.7%)      |
| Edoxaban dose at baseline, n (%)                       |                     |                  |                |                  |               |
| 60 mg                                                  | 9991 (76.3%)        | 42 (27.6%)       | 446 (38.5%)    | 1016 (87.7%)     | 262 (91.3%)   |
| 30 mg                                                  | 3101 (23.7%)        | 110 (72.4%)      | 712 (61.5%)    | 143 (12.3%)      | 25 (8.7%)     |

\* There was no specific definition for frailty; it was left to the discretion of the physician to categorise a patient as frail. AF, atrial fibrillation; BMI, body mass index; COPD, chronic obstructive pulmonary disease; CrCl, creatinine clearance; CRNM, clinically relevant non-major; CV, cardiovascular; ICH, intracranial haemorrhage; OD, once daily; Q1, lower quartile; Q3, upper quartile; SD, standard deviation; TIA, transient ischemic attack.

**Table S2.** Baseline demographics and clinical characteristics of patients included in ETNA-AF-Europe categorised by BMI.

|                 | ETNA-AF-Europe<br>Total | Body Mass Index [kg/m <sup>2</sup> ] |                            |                       |                            |                            |                                                  |                                                  |                                                  |                                                  |
|-----------------|-------------------------|--------------------------------------|----------------------------|-----------------------|----------------------------|----------------------------|--------------------------------------------------|--------------------------------------------------|--------------------------------------------------|--------------------------------------------------|
|                 |                         | Underweight<br><18.5                 | Normal Weight<br>≥18.5–<25 | Overweight<br>≥25–<30 | Class 1 Obesity<br>≥30–<35 | Class 2 + 3 Obesity<br>≥35 |                                                  |                                                  |                                                  |                                                  |
| Patients, N (%) | 13092<br>(100)          | 115<br>(0.92)                        | 3341<br>(26.68)            | 5377<br>(42.94)       | 2544<br>(20.32)            | 1144<br>(9.14%)            | Standard-<br>ised Difference to<br>Normal Weight |
| Female, n (%)   | 5661 (43.2)             | 88 (76.5)                            | 1680 (50.3)                | 2041 (38.0)           | 1011 (39.7)                | 602 (52.6)                 | 0.57                                             | −0.21                                            | 0.05                                             |                                                  |
| Age, years      |                         |                                      |                            |                       |                            |                            |                                                  |                                                  |                                                  |                                                  |
| mean ± SD       | 73.6 ± 9.46             | 76.8 ± 9.76                          | 75.6 ± 9.38                | 74.0 ± 8.99           | 72.1 ± 9.31                | 68.4 ± 9.73                |                                                  |                                                  |                                                  |                                                  |
| median          | 75 (68; 80)             | 78 (72; 84)                          | 77 (70; 82)                | 75 (69; 80)           | 73.0 (67; 79)              | 69.0 (62; 75)              |                                                  |                                                  |                                                  |                                                  |
| <Q1; Q3)        | 1994 (15.2)             | 10 (8.7)                             | 362 (10.8)                 | 724 (13.5)            | 471 (18.5)                 | 354 (30.9)                 |                                                  |                                                  |                                                  |                                                  |
| <65 years       | 4456 (34.0)             | 27 (23.5)                            | 985 (29.5)                 | 1817 (33.8)           | 959 (37.7)                 | 472 (41.3)                 | 0.13                                             | −0.37                                            | −0.76                                            |                                                  |
| 65–<75 years    | 5268 (40.2)             | 54 (47.0)                            | 1466 (43.9)                | 2283 (42.5)           | 940 (36.9)                 | 286 (25.0)                 |                                                  |                                                  |                                                  |                                                  |
| 75–<85 years    | 1372 (10.5)             | 24 (20.9)                            | 528 (15.8)                 | 553 (10.3)            | 172 (6.8)                  | 32 (2.8)                   |                                                  |                                                  |                                                  |                                                  |
| ≥85 years       |                         |                                      |                            |                       |                            |                            |                                                  |                                                  |                                                  |                                                  |
| Body weight, kg | 81.0 ± 17.29            | 48.5 ± 5.58                          | 65.9 ± 9.34                | 79.5 ± 9.79           | 92.2 ± 11.32               | 110.7 ± 18.16              | −1.82                                            | 2.94                                             | 3.12                                             |                                                  |
| mean ± SD       |                         |                                      |                            |                       | 92.0 (84.0; 100.0)         |                            |                                                  |                                                  |                                                  |                                                  |

|                                                  |                   |                   |        |                   |                   |       |                    |       |                     |        |
|--------------------------------------------------|-------------------|-------------------|--------|-------------------|-------------------|-------|--------------------|-------|---------------------|--------|
| median (Q1; Q3)                                  | 80.0 (70.0; 90.0) | 48.0 (45.0; 51.0) |        | 65.0 (59.0; 72.0) | 80.0 (72.0; 86.0) |       | 0 (0.0)            |       | 108.0 (99.0; 120.0) |        |
| ≤60 kg                                           | 1310 (10.3)       | 110 (95.6)        |        | 1066 (31.9)       | 113 (2.1)         |       | 1519 (59.7)        |       | 0 (0.0)             |        |
| 60–<80 kg                                        | 5565 (43.9)       | 5 (4.4)           |        | 2083 (62.4)       | 2934 (54.6)       |       | 566 (22.2)         |       | 24 (2.1)            |        |
| 80–<100 kg                                       | 4346 (34.3)       | 0 (0.0)           |        | 191 (5.7)         | 2249 (41.8)       |       |                    |       | 340 (29.7)          |        |
| ≥100 kg                                          | 1446 (11.4)       | 0 (0.0)           |        | 1 (0.0)           | 81 (1.5)          |       |                    |       | 780 (68.2)          |        |
| BMI, kg/m <sup>2</sup>                           |                   |                   |        |                   |                   |       |                    |       |                     |        |
| mean ± SD                                        | 28.1 ± 5.11       | 17.4 ± 0.96       |        | 23.0 ± 1.56       | 27.3 ± 1.40       |       | 32.0 ± 1.42        |       | 39.1 ± 4.27         |        |
| median (Q1; Q3)                                  | 27.3 (24.7; 30.7) | 17.7 (17.0; 18.1) |        | 23.4 (22.0; 24.2) | 27.3 (26.1; 28.4) |       | 31.8 (30.8; 33.2)  |       | 37.9 (36.0; 40.7)   |        |
| <18.5 kg/m <sup>2</sup>                          | 115 (0.9)         | 115 (100.0)       |        | 0 (0.0)           | 0 (0.0)           |       | 0 (0.0)            |       | 0 (0.0)             |        |
| 18.5–<25 kg/m <sup>2</sup>                       | 3341 (26.7)       | 0 (0.0)           | −3.58  | 3341 (100.0)      | 0 (0.0)           | 2.96  | 0 (0.0)            | 6.03  | 0 (0.0)             | 6.35   |
| 25–<30 kg/m <sup>2</sup>                         | 5377 (42.9)       | 0 (0.0)           |        | 0 (0.0)           | 5377 (100.0)      |       | 2544 (100.0)       |       | 0 (0.0)             |        |
| 30–<35 kg/m <sup>2</sup>                         | 2544 (20.3)       | 0 (0.0)           |        | 0 (0.0)           | 0 (0.0)           |       | 0 (0.0)            |       | 792 (69.2)          |        |
| 35–<40 kg/m <sup>2</sup>                         | 792 (6.3)         | 0 (0.0)           |        | 0 (0.0)           | 0 (0.0)           |       | 0 (0.0)            |       | 352 (30.8)          |        |
| ≥40 kg/m <sup>2</sup>                            | 352 (2.8)         | 0 (0.0)           |        | 0 (0.0)           | 0 (0.0)           |       | 2544 (100.0)       |       | 1144 (100.0)        |        |
| ≥30 kg/m <sup>2</sup>                            | 3688 (29.5)       | 0 (0.0)           |        | 0 (0.0)           | 0 (0.0)           |       |                    |       |                     |        |
| CrCl (recalc.), mL/min,                          |                   |                   |        |                   |                   |       |                    |       |                     |        |
| mean ± SD                                        | 74.3 ± 30.42      | 46.7 ± 21.50      |        | 59.8 ± 21.53      | 71.8 ± 24.44      |       | 84.8 ± 29.63       |       | 108.5 ± 42.74       |        |
| median (Q1; Q3)                                  | 69.8 (53.0; 89.6) | 44.1 (31.8; 57.1) |        | 58.2 (44.0; 72.5) | 69.7 (54.2; 86.0) |       | 82.3 (63.3; 102.5) |       | 102.5 (77.6; 133.1) |        |
| <15 mL/min                                       | 288 (2.5)         | 24 (21.1)         | −0.61  | 163 (5.4)         | 82 (1.7)          | 0.51  | 15 (0.6)           | 0.99  | 1 (0.1)             | 1.71   |
| 15–<30 mL/min                                    | 2103 (18.5)       | 50 (43.9)         |        | 918 (30.2)        | 1545 (32.3)       |       | 231 (9.1)          |       | 58 (5.1)            |        |
| 30–<50 mL/min                                    | 4876 (42.8)       | 32 (28.1)         |        | 1466 (48.3)       | 2163 (45.2)       |       | 817 (32.1)         |       | 218 (19.1)          |        |
| 50–<80 mL/min                                    | 4112 (36.1)       | 8 (7.0)           |        | 487 (16.0)        | 992 (20.7)        |       | 1213 (47.7)        |       | 760 (66.4)          |        |
| ≥80 mL/min                                       |                   |                   |        |                   |                   |       |                    |       |                     |        |
| CHADS <sub>2</sub> (recalc.),                    |                   |                   |        |                   |                   |       |                    |       |                     |        |
| mean ± SD                                        | 1.7 ± 1.07        | 1.60 ± 1.10       |        | 1.7 ± 1.10        | 1.7 ± 1.07        |       | 1.8 ± 1.04         |       | 1.7 ± 0.97          |        |
| median (Q1; Q3)                                  | 2 (1; 2)          | 2 (1; 2)          | −0.05  | 2 (1; 2)          | 2 (1; 2)          | 0.05  | 2.0 (1; 2)         | 0.09  | 2.0 (1; 2)          | −0.009 |
| 0                                                | 1365 (10.4)       | 14 (12.2)         |        | 421 (12.6)        | 543 (10.1)        |       | 198 (7.8)          |       | 90 (7.9)            |        |
| 1–2                                              | 9124 (69.7)       | 81 (70.4)         |        | 2278 (68.2)       | 3771 (70.1)       |       | 1794 (70.5)        |       | 853 (74.6)          |        |
| ≥3                                               | 2603 (19.9)       | 20 (17.4)         |        | 642 (19.2)        | 1063 (19.8)       |       | 552 (21.7)         |       | 201 (17.6)          |        |
| CHA <sub>2</sub> DS <sub>2</sub> -VASc (recalc.) |                   |                   |        |                   |                   |       |                    |       |                     |        |
| mean ± SD                                        | 3.1 ± 1.40        | 3.4 ± 1.34        |        | 3.2 ± 1.40        | 3.1 ± 1.38        |       | 3.1 ± 1.39         |       | 3.0 ± 1.36          |        |
| median (Q1; Q3)                                  | 3 (2; 4)          | 3 (3; 4)          | 0.17   | 3 (2; 4)          | 3 (2; 4)          | −0.07 | 3.0 (2.0; 4.0)     | −0.06 | 3.0 (2.0; 4.0)      | −0.15  |
| 0                                                | 290 (2.2)         | 1 (0.9)           |        | 82 (2.5)          | 116 (2.2)         |       | 44 (1.7)           |       | 24 (2.1)            |        |
| 1                                                | 1324 (10.1)       | 7 (6.1)           |        | 288 (8.6)         | 540 (10.0)        |       | 283 (11.1)         |       | 138 (12.1)          |        |
| 2                                                | 2802 (21.4)       | 18 (15.7)         |        | 686 (20.5)        | 1173 (21.8)       |       | 533 (21.0)         |       | 278 (24.3)          |        |
| 3                                                | 3768 (28.8)       | 36 (31.3)         |        | 928 (27.8)        | 1594 (29.6)       |       | 741 (29.1)         |       | 311 (27.2)          |        |
| ≥4                                               | 4908 (37.5)       | 53 (46.1)         |        | 1357 (40.6)       | 1954 (36.3)       |       | 943 (37.1)         |       | 393 (34.4)          |        |
| mod. HAS-BLED (recalc.)                          |                   |                   |        |                   |                   |       |                    |       |                     |        |
| mean ± SD                                        | 2.5 ± 1.10        | 2.5 ± 1.17        | −0.02  | 2.5 ± 1.11        | 2.6 ± 1.10        | 0.07  | 2.6 ± 1.09         | 0.06  | 2.4 ± 1.05          | −0.12  |
| median (Q1; Q3)                                  | 2 (2; 3)          | 2 (2; 3)          |        | 2 (2; 3)          | 3 (2; 3)          |       | 3.0 (2.0; 3.0)     |       | 2.0 (2.0; 3.0)      |        |
| <3                                               | 6711 (51.3)       | 63 (54.8)         |        | 1738 (52.0)       | 2639 (49.1)       |       | 1237 (48.6)        |       | 662 (57.9)          |        |
| ≥3                                               | 6381 (48.7)       | 52 (45.2)         |        | 1603 (48.0)       | 2738 (50.9)       |       | 1307 (51.4)        |       | 482 (42.1)          |        |
| Frailty *, n (%)                                 |                   |                   |        |                   |                   |       |                    |       |                     |        |
| Yes                                              | 1392 (10.6)       | 42 (36.5)         | 0.50   | 507 (15.2)        | 492 (9.2)         | −0.19 | 206 (8.1)          | −0.22 | 94 (8.2)            | −0.22  |
| No                                               | 10820 (82.7)      | 64 (55.7)         | −0.51  | 2637 (78.9)       | 4540 (84.4)       | 0.14  | 2172 (85.4)        | 0.17  | 977 (85.4)          | 0.17   |
| Not known                                        | 878 (6.7)         | 9 (7.8)           | 0.08   | 197 (5.9)         | 345 (6.4)         | 0.02  | 164 (6.4)          | 0.02  | 73 (6.4)            | 0.02   |
| Medical history, n (%)                           |                   |                   |        |                   |                   |       |                    |       |                     |        |
| Hypertension                                     | 10088 (77.1)      | 62 (53.9)         | −0.32  | 2316 (69.3)       | 4221 (78.5)       | 0.21  | 2137 (84.0)        | 0.35  | 983 (85.9)          | 0.41   |
| Diabetes                                         | 2879 (22.0)       | 13 (11.3)         | −0.11  | 501 (15.0)        | 1095 (20.4)       | 0.14  | 752 (29.6)         | 0.36  | 412 (36.0)          | 0.50   |
| Dys-/hyperlipidaemia                             | 5626 (43.0)       | 42 (36.5)         | −0.02  | 1259 (37.7)       | 2402 (44.7)       | 0.14  | 1205 (47.4)        | 0.20  | 502 (43.9)          | 0.13   |
| Coronary heart disease                           | 2738 (20.9)       | 21 (18.3)         | −0.009 | 622 (18.2)        | 1224 (22.8)       | 0.10  | 578 (22.7)         | 0.10  | 210 (18.4)          | −0.007 |

|                                                               |             |            |       |             |             |        |             |        |            |       |
|---------------------------------------------------------------|-------------|------------|-------|-------------|-------------|--------|-------------|--------|------------|-------|
| Peripheral artery disease                                     | 437 (3.3)   | 6 (5.2)    | 0.09  | 115 (3.4)   | 189 (3.5)   | 0.004  | 83 (3.3)    | −0.01  | 28 (2.4)   | −0.06 |
| Congestive heart failure                                      | 1850 (14.2) | 19 (16.5)  | 0.04  | 455 (13.6)  | 757 (14.1)  | 0.009  | 380 (15.0)  | 0.03   | 181 (15.9) | 0.10  |
| Myocardial infarction                                         | 560 (4.3)   | 4 (3.5)    | −0.04 | 144 (4.3)   | 244 (4.5)   | 0.01   | 120 (4.7)   | 0.02   | 26 (2.3)   | −0.11 |
| TIA                                                           | 448 (3.4)   | 5 (4.3)    | 0.02  | 135 (4.0)   | 167 (3.1)   | −0.05  | 78 (3.1)    | −0.05  | 26 (2.3)   | −0.10 |
| Hyper/hypothyroidism                                          | 1611 (12.3) | 13 (11.3)  | −0.02 | 398 (11.9)  | 634 (11.8)  | −0.004 | 314 (12.3)  | 0.01   | 187 (16.3) | 0.13  |
| Digestive tract disease                                       | 1086 (8.3)  | 19 (16.5)  | 0.24  | 287 (8.6)   | 439 (8.2)   | −0.02  | 215 (8.5)   | −0.005 | 84 (7.3)   | −0.05 |
| COPD                                                          | 1206 (9.2)  | 15 (13.0)  | 0.14  | 287 (8.6)   | 491 (9.1)   | 0.02   | 256 (10.1)  | 0.05   | 126 (11.0) | 0.08  |
| History of stroke & ICH, <i>n</i> (%)                         |             |            |       |             |             |        |             |        |            |       |
| Ischaemic stroke                                              | 778 (5.9)   | 9 (7.8)    | 0.05  | 222 (6.6)   | 324 (6.0)   | −0.03  | 130 (5.1)   | −0.07  | 35 (3.1)   | −0.17 |
| Intracranial haemorrhage                                      | 62 (0.5)    | 1 (0.9)    | 0.06  | 13 (0.4)    | 35 (0.7)    | 0.04   | 10 (0.4)    | 0.0006 | 1 (0.1)    | −0.06 |
| History of bleeding, <i>n</i> (%)                             |             |            |       |             |             |        |             |        |            |       |
| Major                                                         | 129 (3.2)   | 4 (3.5)    | −0.02 | 129 (3.9)   | 171 (3.2)   | −0.04  | 66 (2.6)    | −0.07  | 38 (3.3)   | −0.03 |
| Major or CRNM                                                 | 129 (1.0)   | 1 (0.9)    | −0.04 | 41 (1.2)    | 52 (1.0)    | −0.03  | 19 (0.7)    | −0.05  | 12 (1.0)   | −0.02 |
| Major or CRNM                                                 | 270 (2.1)   | 3 (2.6)    | 0.006 | 84 (2.5)    | 111 (2.1)   | −0.03  | 42 (1.7)    | −0.06  | 21 (1.8)   | −0.05 |
| Current AF type, <i>n</i> (%)                                 |             |            |       |             |             |        |             |        |            |       |
| Paroxysmal                                                    | 7039 (53.9) | 66 (57.9)  | 0.002 | 1915 (57.4) | 2845 (53.0) | −0.09  | 1303 (51.2) | −0.12  | 566 (49.5) | −0.16 |
| Persistent                                                    | 3159 (24.2) | 27 (23.7)  | 0.04  | 729 (21.9)  | 1345 (25.0) | 0.08   | 657 (25.8)  | 0.09   | 305 (26.7) | 0.11  |
| Long-standing persistent & Permanent                          | 2864 (21.9) | 21 (18.4)  | −0.06 | 692 (20.7)  | 1180 (22.0) | 0.03   | 583 (22.9)  | 0.05   | 271 (23.7) | 0.07  |
| Patients fulfilling ≥1 dose adjustment criteria, <i>n</i> (%) |             |            |       |             |             |        |             |        |            |       |
|                                                               | 3106 (23.7) | 112 (97.4) | 1.32  | 1622 (48.5) | 977 (18.2)  | −0.68  | 269 (10.6)  | −0.92  | 73 (6.4)   | −1.07 |
| Edoxaban dose at baseline, <i>n</i> (%)                       |             |            |       |             |             |        |             |        |            |       |
| 60 mg OD                                                      | 9991 (76.3) | 43 (37.4)  | −0.57 | 2170 (65.0) | 4279 (79.6) | 0.33   | 2081 (81.8) | 0.39   | 968 (84.6) | 0.46  |
| 30 mg OD                                                      | 3101 (23.7) | 72 (62.6)  | 0.57  | 1171 (35.0) | 1098 (20.4) | −0.33  | 463 (18.2)  | −0.39  | 176 (15.4) | −0.46 |

\* There was no specific definition for frailty; it was left to the discretion of the physician to categorise a patient as frail. AF, atrial fibrillation; BMI, body mass index; COPD, chronic obstructive pulmonary disease; CrCl, creatinine clearance; CRNM, clinically relevant non-major; CV, cardiovascular; ICH, intracranial haemorrhage; OD, once daily; Q1, lower quartile; Q3, upper quartile; SD, standard deviation; TIA, transient ischemic attack.

**Table S3.** Outcomes at 1 year split by gender for weight categories (unadjusted data).

| Event Type                      | Gender | Weight (kg)–HR Compared with Normal Weight >60 and ≤80kg |                |                                    |                                    |
|---------------------------------|--------|----------------------------------------------------------|----------------|------------------------------------|------------------------------------|
|                                 |        | ≤60 kg                                                   | >60–≤80 kg     | >80–≤100 kg                        | >100 kg                            |
| Major bleeding                  | Female | 1.15 (0.64,2.07) <i>p</i> = 0.65                         | 1.00-reference | 0.51 (0.23,1.15) <i>p</i> = 0.10   | 0.75 (0.23,2.45) <i>p</i> = 0.64   |
|                                 | Male   | 0.00 (0.00, NE) <i>p</i> = 0.98                          | 1.00-reference | 0.78 (0.48,1.29) <i>p</i> = 0.33   | 0.22 (0.07,0.71) <i>p</i> = 0.0116 |
| Major or CRNM bleeding          | Female | 1.01 (0.65,1.56) <i>p</i> = 0.98                         | 1.00-reference | 0.77 (0.47,1.25) <i>p</i> = 0.29   | 0.63 (0.25,1.55) <i>p</i> = 0.31   |
|                                 | Male   | 0.71 (0.22,2.26) <i>p</i> = 0.56                         | 1.00-reference | 0.77 (0.55,1.08) <i>p</i> = 0.13   | 0.55 (0.33,0.94) <i>p</i> = 0.0287 |
| Major GI bleeding               | Female | 1.65 (0.64,4.24) <i>p</i> = 0.30                         | 1.00-reference | 0.96 (0.31,3.02) <i>p</i> = 0.94   | 0.00 (0.00, NE) <i>p</i> = 0.99    |
|                                 | Male   | 0.00 (0.00, NE) <i>p</i> = 0.99                          | 1.00-reference | 0.96 (0.31,3.02) <i>p</i> = 0.94   | 0.76 (0.15,3.89) <i>p</i> = 0.74   |
| Intracranial haemorrhage        | Female | 1.29 (0.24,7.06) <i>p</i> = 0.77                         | 1.00-reference | 1.98 (0.44,8.84) <i>p</i> = 0.37   | 2.27 (0.25,20.28) <i>p</i> = 0.46  |
|                                 | Male   | 0.00 (0.00, NE) <i>p</i> = 0.99                          | 1.00-reference | 0.72 (0.28,1.86) <i>p</i> = 0.50   | 0.26 (0.03,2.04) <i>p</i> = 0.20   |
| Any stroke or systemic embolism | Female | 0.92 (0.46,1.82) <i>p</i> = 0.81                         | 1.00-reference | 0.94 (0.47,1.86) <i>p</i> = 0.85   | 0.29 (0.04,2.13) <i>p</i> = 0.22   |
|                                 | Male   | 0.00 (0.00, NE) <i>p</i> = 0.98                          | 1.00-reference | 1.00 (0.53,1.90) <i>p</i> = 1.00   | 0.96 (0.40,2.31) <i>p</i> = 0.92   |
| Ischaemic stroke                | Female | 0.90 (0.40,2.01) <i>p</i> = 0.79                         | 1.00-reference | 0.57 (0.22,1.50) <i>p</i> = 0.26   | 0.39 (0.05,2.90) <i>p</i> = 0.36   |
|                                 | Male   | 0.00 (0.00, NE) <i>p</i> = 0.99                          | 1.00-reference | 0.81 (0.36,1.80) <i>p</i> = 0.61   | 0.97 (0.34,2.75) <i>p</i> = 0.95   |
| Haemorrhagic stroke             | Female | 2.61 (0.16,41.66) <i>p</i> = 0.50                        | 1.00-reference | 5.28 (0.48,58.3) <i>p</i> = 0.17   | 0.00 (0.00, NE) <i>p</i> = 1.00    |
|                                 | Male   | 0.00 (0.00, NE) <i>p</i> = 0.99                          | 1.00-reference | 1.02 (0.27,3.78) <i>p</i> = 0.98   | 0.59 (0.07,5.24) <i>p</i> = 0.63   |
|                                 | Female | 2.60 (0.91,7.42) <i>p</i> = 0.07                         | 1.00-reference | 3.40 (1.27,9.13) <i>p</i> = 0.0152 | 1.29 (0.16,10.48) <i>p</i> = 0.81  |

|                                                 |        |                               |                |                               |                               |
|-------------------------------------------------|--------|-------------------------------|----------------|-------------------------------|-------------------------------|
| Myocardial infarction                           | Male   | 1.04 (0.14,7.84) $p = 0.97$   | 1.00-reference | 1.07 (0.56,2.04) $p = 0.85$   | 0.29 (0.07,1.27) $p = 0.10$   |
| Cardiovascular mortality (sensitivity analysis) | Female | 1.48 (0.90,2.44) $p = 0.13$   | 1.00-reference | 0.82 (0.44,1.52) $p = 0.52$   | 0.86 (0.31,2.40), $p = 0.77$  |
|                                                 | Male   | 3.06 (1.56,6.01) $p = 0.0011$ | 1.00-reference | 0.59 (0.39,0.89) $p = 0.0108$ | 0.55 (0.30,1.01) $p = 0.05$   |
| All-cause mortality                             | Female | 2.19 (1.58,3.04) $p < 0.0001$ | 1.00-reference | 1.08 (0.72,1.63) $p = 0.71$   | 0.81 (0.37,1.76) $p = 0.59$   |
|                                                 | Male   | 2.93 (1.80,4.77) $p < 0.0001$ | 1.00-reference | 0.64 (0.48,0.85) $p = 0.0018$ | 0.63 (0.42,0.95) $p = 0.0273$ |

CRNM, clinically relevant non-major bleeding; GI, gastrointestinal; ICH, intracranial haemorrhage; NE, non-estimable.

**Table S4.** Outcomes at 1 year split by gender for weight categories (adjusted for eGFR and CHA<sub>2</sub>DS<sub>2</sub>-VASc).

| Event Type                                      | Gender<br>N (Total Events; Events<br>Per Group) | Weight (kg)–HR Compared with Normal Weight >60 and ≤80kg |                |                               |                              |
|-------------------------------------------------|-------------------------------------------------|----------------------------------------------------------|----------------|-------------------------------|------------------------------|
|                                                 |                                                 | ≤60 kg                                                   | >60–≤80 kg     | >80–≤100 kg                   | >100 kg                      |
| Major bleeding                                  | Female (62; 16, 36, 7, 3)                       | 0.99 (0.54,1.84) $p = 0.98$                              | 1.00-reference | 0.62 (0.27,1.43) $p = 0.26$   | 1.32 (0.36,4.80) $p = 0.68$  |
|                                                 | Male (70; 0, 32, 31, 3)                         | 0.00 (0.00, NE) $p = 0.98$                               | 1.00-reference | 1.02 (0.60,1.74) $p = 0.94$   | 0.43 (0.12,1.53) $p = 0.19$  |
| Major or CRNM bleeding                          | Female (129; 28, 72, 21, 5)                     | 0.92 (0.58,1.45) $p = 0.71$                              | 1.00-reference | 0.95 (0.57,1.59) $p = 0.84$   | 0.96 (0.33,2.81) $p = 0.94$  |
|                                                 | Male (164; 3, 71, 68, 17)                       | 0.55 (0.17,1.77) $p = 0.32$                              | 1.00-reference | 0.98 (0.68,1.40) $p = 0.91$   | 0.87 (0.45,1.67) $p = 0.67$  |
| Major GI bleeding                               | Female (22; 7, 11, 4, 0)                        | 1.28 (0.47,3.47) $p = 0.63$                              | 1.00-reference | 1.22 (0.37,4.01) $p = 0.74$   | 0.00 (0.00, NE) $p = 0.99$   |
|                                                 | Male (29; 0, 14, 11, 2)                         | 0.00 (0.00, NE) $p = 0.99$                               | 1.00-reference | 0.89 (0.39,2.06) $p = 0.79$   | 0.76 (0.15,3.89) $p = 0.74$  |
| Intracranial haemorrhage                        | Female (10; 2, 4, 3, 1)                         | 1.60 (0.25,10.01) $p = 0.62$                             | 1.00-reference | 2.77 (0.53,14.58) $p = 0.23$  | 3.58 (0.26,50.01) $p = 0.34$ |
|                                                 | Male (20; 0, 9, 8, 1)                           | 0.00 (0.00, NE) $p = 0.99$                               | 1.00-reference | 0.89 (0.31,2.55) $p = 0.83$   | 0.36 (0.04,3.64) $p = 0.39$  |
| Any stroke or systemic embolism                 | Female (55; 11, 31, 11, 1)                      | 0.81 (0.37,1.76) $p = 0.59$                              | 1.00-reference | 1.04 (0.49,2.22) $p = 0.92$   | 0.44 (0.05,3.60) $p = 0.44$  |
|                                                 | Male (48; 0, 17, 21, 7)                         | 0.00 (0.00, NE) $p = 0.98$                               | 1.00-reference | 1.24 (0.62,2.47) $p = 0.54$   | 1.63 (0.58,4.64) $p = 0.36$  |
| Ischaemic stroke                                | Female (38; 8, 23, 5, 1)                        | 0.76 (0.30,1.93) $p = 0.56$                              | 1.00-reference | 0.60 (0.22,1.64) $p = 0.32$   | 0.40 (0.04,3.59) $p = 0.41$  |
|                                                 | Male (32; 0, 12, 12, 5)                         | 0.00 (0.00, NE) $p = 0.99$                               | 1.00-reference | 0.91 (0.38,2.18) $p = 0.83$   | 1.36 (0.38,4.87) $p = 0.64$  |
| Haemorrhagic stroke                             | Female (4; 1, 1, 2, 0)                          | 0.00 (0.00, NE) $p = 0.10$                               | 1.00-reference | 2.42 (0.34,17.2) $p = 0.36$   | 0.00 (0.00, NE) $p = 1.00$   |
|                                                 | Male (10; 0, 4, 5, 1)                           | 0.00 (0.00, NE) $p = 0.99$                               | 1.00-reference | 1.13 (0.28,4.55) $p = 0.86$   | 0.73 (0.06,9.08) $p = 0.81$  |
| Myocardial infarction                           | Female (25; 7, 7, 9, 1)                         | 2.57 (0.87,7.61) $p = 0.09$                              | 1.00-reference | 3.40 (1.21,9.58) $p = 0.0208$ | 2.16 (0.27,17.28) $p = 0.60$ |
|                                                 | Male (41; 1, 16, 21, 2)                         | 0.92 (0.12,7.06) $p = 0.93$                              | 1.00-reference | 1.38 (0.67,2.87) $p = 0.39$   | 0.57 (0.11,2.86) $p = 0.50$  |
| Cardiovascular mortality (sensitivity analysis) | Female (85; 24, 42, 13, 4)                      | 1.25 (0.73,2.15) $p = 0.42$                              | 1.00-reference | 1.41 (0.73,2.70) $p = 0.31$   | 2.42 (0.69,8.43) $p = 0.17$  |
|                                                 | Male (121; 10, 55, 40, 13)                      | 2.18 (1.09,4.35) $p = 0.0268$                            | 1.00-reference | 0.84 (0.54,1.30) $p = 0.43$   | 1.00 (0.47,2.13) $p = 1.00$  |
| All-cause mortality                             | Female (183; 66, 78, 32, 7 *)                   | 1.87 (1.31,2.67) $p = 0.0006$                            | 1.00-reference | 1.66 (1.07,2.57) $p = 0.0244$ | 2.16 (0.89,5.24) $p = 0.09$  |
|                                                 | Male (246; 19, 110, 87, 30 *)                   | 2.00 (1.22,3.28) $p = 0.0063$                            | 1.00-reference | 0.91 (0.68,1.24) $p = 0.56$   | 1.49 (0.91,2.42) $p = 0.11$  |

\* 4 deaths at females and 8 deaths at males with missing weight. CRNM, clinically relevant non-major bleeding; GI, gastrointestinal; ICH, intracranial haemorrhage; NE, non-estimable.

**Table S5.** Outcomes at 1-year categorised by BMI (unadjusted data).

| Annualised Event Rates, $n$ (%/Year) [95% CI] | Etna-af-Europe Total    | BMI [kg/m <sup>2</sup> ]–HR Compared with Normal Weight BMI ≥18.5 and <25 |                                           |                                       |                                           |                                         |                                      |                                           |                                      |                                           |                                         |
|-----------------------------------------------|-------------------------|---------------------------------------------------------------------------|-------------------------------------------|---------------------------------------|-------------------------------------------|-----------------------------------------|--------------------------------------|-------------------------------------------|--------------------------------------|-------------------------------------------|-----------------------------------------|
|                                               |                         | Unadjusted HRs                                                            |                                           |                                       |                                           |                                         |                                      |                                           |                                      |                                           |                                         |
|                                               |                         | Under-weight <18.5 kg/m <sup>2</sup>                                      | Normal Weight ≥18.5–<25 kg/m <sup>2</sup> | Over-weight ≥25–<30 kg/m <sup>2</sup> | Class 1 Obesity ≥30–<35 kg/m <sup>2</sup> | Class 2+3 Obesity ≥35 kg/m <sup>2</sup> | Under-weight <18.5 kg/m <sup>2</sup> | Normal Weight ≥18.5–<25 kg/m <sup>2</sup> | Overweight ≥25–<30 kg/m <sup>2</sup> | Class 1 Obesity ≥30–<35 kg/m <sup>2</sup> | Class 2+3 Obesity ≥35 kg/m <sup>2</sup> |
| Patients, N (%)                               | 13092 (100%)            | 115 (0.92%)                                                               | 3341 (26.68%)                             | 5377 (42.94%)                         | 2544 (20.32%)                             | 1144 (9.14%)                            | 115 (0.92%)                          | 3341 (26.68%)                             | 5377 (42.94%)                        | 2544 (20.32%)                             | 1144 (9.14%)                            |
| Major bleeding                                | 132 (1.05) [0.88; 1.25] | 0 (0.00) n.a.                                                             | 41 (1.29) [0.92; 1.75]                    | 57 (1.10) [0.83; 1.43]                | 22 (0.89) [0.53; 1.25]                    | 7 (0.64) [0.19; 1.09]                   | 0.00 (0.00, NE) $p = 0.97$           | 1.00-reference                            | 0.86 (0.57, 1.28) $p = 0.45$         | 0.70 (0.41, 1.17) $p = 0.17$              | 0.50 (0.22, 1.10) $p = 0.09$            |
| Major or CRNM bleeding                        | 293 (2.35) [2.09; 2.63] | 5 (4.91) [1.59; 11.44]                                                    | 88 (2.79) [2.23; 3.43]                    | 110 (2.14) [1.76; 2.58]               | 58 (2.37) [1.79; 2.95]                    | 21 (1.92) [1.14; 2.69]                  | 1.76 (0.71, 4.32) $p = 0.22$         | 1.00-reference                            | 0.77 (0.58, 1.02) $p = 0.07$         | 0.85 (0.61, 1.19) $p = 0.34$              | 0.69 (0.43, 1.11) $p = 0.13$            |
| Major GI bleeding                             | 51 (0.40) [0.30; 0.53]  | 0 (0.00) n.a.                                                             | 15 (0.47) [0.26; 0.77]                    | 21 (0.40) [0.25; 0.62]                | 9 (0.36) [0.13; 0.59]                     | 3 (0.27) [0.00; 0.57]                   | 0.00 (0.00, NE) $p = 0.98$           | 1.00-reference                            | 0.86 (0.45, 1.68) $p = 0.67$         | 0.78 (0.34, 1.78) $p = 0.55$              | 0.58 (0.17, 2.01) $p = 0.39$            |
| Intracranial haemorrhage                      | 30 (0.24) [0.16; 0.34]  | 0 (0.00) n.a.                                                             | 7 (0.22) [0.09; 0.45]                     | 14 (0.27) [0.15; 0.45]                | 5 (0.20) [0.02; 0.37]                     | 2 (0.18) [0.00; 0.43]                   | 0.00 (0.00, NE) $p = 0.99$           | 1.00-reference                            | 1.23 (0.50, 3.05) $p = 0.65$         | 0.93 (0.29, 2.92) $p = 0.90$              | 0.83 (0.17, 3.99) $p = 0.82$            |
| Any stroke or systemic embolism               | 103 (0.82) [0.67; 0.99] | 1 (0.97) [0.02; 5.41]                                                     | 22 (0.69) [0.43; 1.04]                    | 47 (0.91) [0.67; 1.21]                | 17 (0.69) [0.37; 1.00]                    | 12 (1.09) [0.50; 1.68]                  | 1.40 (0.19, 10.39) $p = 0.74$        | 1.00-reference                            | 1.32 (0.79, 2.19) $p = 0.29$         | 1.00 (0.53, 1.89) $p = 0.99$              | 1.58 (0.78, 3.20) $p = 0.20$            |

|                                                 |                            |                             |                            |                            |                           |                           |                                   |                |                                   |                                   |                                 |
|-------------------------------------------------|----------------------------|-----------------------------|----------------------------|----------------------------|---------------------------|---------------------------|-----------------------------------|----------------|-----------------------------------|-----------------------------------|---------------------------------|
| Ischaemic stroke                                | 70 (0.56)<br>[0.43; 0.70]  | 1 (0.97)<br>[0.02; 5.41]    | 17 (0.53)<br>[0.31; 0.85]  | 32 (0.62)<br>[0.42; 0.87]  | 8 (0.32)<br>[0.11; 0.54]  | 8 (0.73)<br>[0.25; 1.21]  | 1.81 (0.24, 13.60)<br>$p = 0.56$  | 1.00-reference | 1.16 (0.65, 2.09)<br>$p = 0.62$   | 0.61 (0.26, 1.41)<br>$p = 0.25$   | 1.36 (0.59, 3.16)<br>$p = 0.47$ |
| Haemorrhagic stroke                             | 14 (0.11)<br>[0.06; 0.19]  | 0 (0.00)<br>n.a.            | 3 (0.09)<br>[0.02; 0.27]   | 6 (0.12)<br>[0.04; 0.25]   | 4 (0.16)<br>[0.00; 0.31]  | 1 (0.09)<br>[0.00; 0.26]  | 0.00 (0.00, NE)<br>$p = 0.99$     | 1.00-reference | 1.23 (0.31, 4.93)<br>$p = 0.77$   | 1.73 (0.39, 7.75)<br>$p = 0.47$   | 0.97 (0.10, 9.30)<br>$p = 0.98$ |
| Myocardial infarction                           | 66 (0.52)<br>[0.41; 0.67]  | 0 (0.00)<br>n.a.            | 13 (0.41)<br>[0.22; 0.70]  | 32 (0.62)<br>[0.42; 0.87]  | 12 (0.49)<br>[0.22; 0.70] | 6 (0.54)<br>[0.23; 0.76]  | 0.00 (0.00, NE)<br>$p = 0.98$     | 1.00-reference | 1.52 (0.80, 2.90)<br>$p = 0.20$   | 1.20 (0.55, 2.63)<br>$p = 0.65$   | 1.34 (0.51, 3.52)<br>$p = 0.55$ |
| Cardiovascular mortality (sensitivity analysis) | 206 (1.63)<br>[1.42; 1.87] | 7 (6.75)<br>[2.71; 13.87]   | 63 (1.97)<br>[1.51; 2.52]  | 80 (1.54)<br>[1.22; 1.92]  | 33 (1.34)<br>[0.90; 1.78] | 15 (1.36)<br>[0.70; 2.02] | 3.43 (1.57, 7.49)<br>$p = 0.0020$ | 1.00-reference | 0.78 (0.56, 1.10)<br>$p = 0.15$   | 0.68 (0.45, 1.04)<br>$p = 0.07$   | 0.69 (0.39, 1.21)<br>$p = 0.20$ |
| All-cause mortality                             | 442 (3.50)<br>[3.18; 3.84] | 16 (15.43)<br>[8.79; 24.98] | 143 (4.46)<br>[3.76; 5.26] | 160 (3.08)<br>[2.62; 3.59] | 64 (2.59)<br>[1.98; 3.19] | 36 (3.26)<br>[2.25; 4.27] | 3.47 (2.07, 5.81)<br>$p < 0.0001$ | 1.00-reference | 0.69 (0.55, 0.86)<br>$p = 0.0012$ | 0.58 (0.43, 0.78)<br>$p = 0.0003$ | 0.73 (0.51, 1.05)<br>$p = 0.09$ |

Table S6. Outcomes at 1-year categorised by BMI (adjusted for eGFR and CHA<sub>2</sub>DS<sub>2</sub>-VASc).

| Annualised Event Rates, n (%/Year) [95% CI]     | ETNA-AF-Europe Total       | BMI [kg/m <sup>2</sup> ]             |                                           |                                       |                                           | BMI [kg/m <sup>2</sup> ]-HR Compared with Normal Weight BMI ≥18.5 and <25 |                                      |                                           |                                      |                                           |                                         |
|-------------------------------------------------|----------------------------|--------------------------------------|-------------------------------------------|---------------------------------------|-------------------------------------------|---------------------------------------------------------------------------|--------------------------------------|-------------------------------------------|--------------------------------------|-------------------------------------------|-----------------------------------------|
|                                                 |                            | Under-weight <18.5 kg/m <sup>2</sup> | Normal Weight ≥18.5–<25 kg/m <sup>2</sup> | Over-weight ≥25–<30 kg/m <sup>2</sup> | Class 1 Obesity ≥30–<35 kg/m <sup>2</sup> | Class 2+3 Obesity ≥35 kg/m <sup>2</sup>                                   | Under-weight <18.5 kg/m <sup>2</sup> | Normal Weight ≥18.5–<25 kg/m <sup>2</sup> | Overweight ≥25–<30 kg/m <sup>2</sup> | Class 1 Obesity ≥30–<35 kg/m <sup>2</sup> | Class 2+3 Obesity ≥35 kg/m <sup>2</sup> |
| Patients, N (%)                                 | 13092 (100%)               | 115 (0.92%)                          | 3341 (26.68%)                             | 5377 (42.94%)                         | 2544 (20.32%)                             | 1144 (9.14%)                                                              | 115 (0.92%)                          | 3341 (26.68%)                             | 5377 (42.94%)                        | 2544 (20.32%)                             | 1144 (9.14%)                            |
| Major bleeding                                  | 132 (1.05)<br>[0.88; 1.25] | 0 (0.00)<br>n.a.                     | 41 (1.29)<br>[0.92; 1.75]                 | 57 (1.10)<br>[0.83; 1.43]             | 22 (0.89)<br>[0.53; 1.25]                 | 7 (0.64)<br>[0.19; 1.09]                                                  | 0.00 (0.00, NE)<br>$p = 0.97$        | 1.00-reference                            | 0.99 (0.65, 1.50)<br>$p = 0.96$      | 0.93 (0.54, 1.60)<br>$p = 0.78$           | 0.83 (0.35, 1.95)<br>$p = 0.66$         |
| Major or CRNM bleeding                          | 293 (2.35)<br>[2.09; 2.63] | 5 (4.91)<br>[1.59; 11.44]            | 88 (2.79)<br>[2.23; 3.43]                 | 110 (2.14)<br>[1.76; 2.58]            | 58 (2.37)<br>[1.79; 2.95]                 | 21 (1.92)<br>[1.14; 2.69]                                                 | 1.40 (0.57, 3.46)<br>$p = 0.47$      | 1.00-reference                            | 0.88 (0.65, 1.18)<br>$p = 0.38$      | 1.01 (0.70, 1.46)<br>$p = 0.95$           | 1.01 (0.59, 1.74)<br>$p = 0.97$         |
| Major GI bleeding                               | 51 (0.40)<br>[0.30; 0.53]  | 0 (0.00)<br>n.a.                     | 15 (0.47)<br>[0.26; 0.77]                 | 21 (0.40)<br>[0.25; 0.62]             | 9 (0.36)<br>[0.13; 0.59]                  | 3 (0.27)<br>[0.00; 0.57]                                                  | 0.00 (0.00, NE)<br>$p = 0.98$        | 1.00-reference                            | 1.08 (0.55, 2.13)<br>$p = 0.82$      | 1.17 (0.49, 2.79)<br>$p = 0.73$           | 1.20 (0.32, 4.48)<br>$p = 0.79$         |
| Intracranial haemorrhage                        | 30 (0.24)<br>[0.16; 0.34]  | 0 (0.00)<br>n.a.                     | 7 (0.22)<br>[0.09; 0.45]                  | 14 (0.27)<br>[0.15; 0.45]             | 5 (0.20)<br>[0.02; 0.37]                  | 2 (0.18)<br>[0.00; 0.43]                                                  | 0.00 (0.00, NE)<br>$p = 0.99$        | 1.00-reference                            | 1.38 (0.52, 3.70)<br>$p = 0.52$      | 1.10 (0.32, 3.84)<br>$p = 0.88$           | 1.00 (0.17, 5.86)<br>$p = 1.00$         |
| Any stroke or systemic embolism                 | 103 (0.82)<br>[0.67; 0.99] | 1 (0.97)<br>[0.02; 5.41]             | 22 (0.69)<br>[0.43; 1.04]                 | 47 (0.91)<br>[0.67; 1.21]             | 17 (0.69)<br>[0.37; 1.00]                 | 12 (1.09)<br>[0.50; 1.68]                                                 | 1.18 (0.16, 8.82)<br>$p = 0.87$      | 1.00-reference                            | 1.43 (0.83, 2.45)<br>$p = 0.20$      | 1.20 (0.60, 2.37)<br>$p = 0.61$           | 2.12 (0.94, 4.80)<br>$p = 0.07$         |
| Ischaemic stroke                                | 70 (0.56)<br>[0.43; 0.70]  | 1 (0.97)<br>[0.02; 5.41]             | 17 (0.53)<br>[0.31; 0.85]                 | 32 (0.62)<br>[0.42; 0.87]             | 8 (0.32)<br>[0.11; 0.54]                  | 8 (0.73)<br>[0.25; 1.21]                                                  | 1.65 (0.22, 12.55)<br>$p = 0.63$     | 1.00-reference                            | 1.23 (0.65, 2.32)<br>$p = 0.52$      | 0.60 (0.24, 1.53)<br>$p = 0.28$           | 1.59 (0.60, 4.22)<br>$p = 0.35$         |
| Haemorrhagic stroke                             | 14 (0.11)<br>[0.06; 0.19]  | 0 (0.00)<br>n.a.                     | 3 (0.09)<br>[0.02; 0.27]                  | 6 (0.12)<br>[0.04; 0.25]              | 4 (0.16)<br>[0.00; 0.31]                  | 1 (0.09)<br>[0.00; 0.26]                                                  | 0.00 (0.00, NE)<br>$p = 0.99$        | 1.00-reference                            | 1.13 (0.26, 4.85)<br>$p = 0.87$      | 2.05 (0.42, 10.14)<br>$p = 0.38$          | 1.29 (0.11, 15.21)<br>$p = 0.84$        |
| Myocardial infarction                           | 66 (0.52)<br>[0.41; 0.67]  | 0 (0.00)<br>n.a.                     | 13 (0.41)<br>[0.22; 0.70]                 | 32 (0.62)<br>[0.42; 0.87]             | 12 (0.49)<br>[0.22; 0.70]                 | 6 (0.54)<br>[0.23; 0.76]                                                  | 0.00 (0.00, NE)<br>$p = 0.98$        | 1.00-reference                            | 1.71 (0.87, 3.38)<br>$p = 0.12$      | 1.39 (0.59, 3.27)<br>$p = 0.45$           | 1.64 (0.53, 5.11)<br>$p = 0.39$         |
| Cardiovascular mortality (sensitivity analysis) | 206 (1.63)<br>[1.42; 1.87] | 7 (6.75)<br>[2.71; 13.87]            | 63 (1.97)<br>[1.51; 2.52]                 | 80 (1.54)<br>[1.22; 1.92]             | 33 (1.34)<br>[0.90; 1.78]                 | 15 (1.36)<br>[0.70; 2.02]                                                 | 2.56 (1.16, 5.64)<br>$p = 0.0194$    | 1.00-reference                            | 1.01 (0.71, 1.44)<br>$p = 0.95$      | 0.98 (0.61, 1.55)<br>$p = 0.91$           | 1.29 (0.68, 2.46)<br>$p = 0.44$         |
| All-cause mortality                             | 442 (3.50)<br>[3.18; 3.84] | 16 (15.43)<br>[8.79; 24.98]          | 143 (4.46)<br>[3.76; 5.26]                | 160 (3.08)<br>[2.62; 3.59]            | 64 (2.59)<br>[1.98; 3.19]                 | 36 (3.26)<br>[2.25; 4.27]                                                 | 2.51 (1.49, 4.22)<br>$p = 0.0006$    | 1.00-reference                            | 0.87 (0.69, 1.10)<br>$p = 0.24$      | 0.79 (0.57, 1.10)<br>$p = 0.16$           | 1.44 (0.95, 2.17)<br>$p = 0.08$         |

**Table S7.** Outcomes at 1-year split by gender for BMI categories (unadjusted data).

| Event Type                                      | Gender | BMI [kg/m <sup>2</sup> ]-HR Compared with Normal Weight BMI ≥18.5 and <25 |                                           |                                      |                                           |                                         |
|-------------------------------------------------|--------|---------------------------------------------------------------------------|-------------------------------------------|--------------------------------------|-------------------------------------------|-----------------------------------------|
|                                                 |        | Underweight <18.5 kg/m <sup>2</sup>                                       | Normal Weight ≥18.5–<25 kg/m <sup>2</sup> | Overweight ≥25–<30 kg/m <sup>2</sup> | Class 1 Obesity ≥30–<35 kg/m <sup>2</sup> | Class 2+3 Obesity ≥35 kg/m <sup>2</sup> |
| Major bleeding                                  | Female | 0.00 (0.00, NE) <i>p</i> = 0.98                                           | 1.00-reference                            | 0.67 (0.38, 1.17) <i>p</i> = 0.16    | 0.55 (0.26,1.16) <i>p</i> = 0.12          | 0.41 (0.14,1.17) <i>p</i> = 0.10        |
|                                                 | Male   | 0.00 (0.00, NE) <i>p</i> = 0.98                                           | 1.00-reference                            | 1.23 (0.66, 2.29) <i>p</i> = 0.51    | 0.99 (0.47,2.11) <i>p</i> = 0.99          | 0.65 (0.19,2.27) <i>p</i> = 0.50        |
| Major or CRNM bleeding                          | Female | 1.61 (0.58,4.45) <i>p</i> = 0.36                                          | 1.00-reference                            | 0.62 (0.40, 0.95) <i>p</i> = 0.0265  | 0.70 (0.42,1.17) <i>p</i> = 0.18          | 0.79 (0.44,1.44) <i>p</i> = 0.45        |
|                                                 | Male   | 1.86 (0.26,13.56) <i>p</i> = 0.54                                         | 1.00-reference                            | 0.92 (0.62, 1.36) <i>p</i> = 0.68    | 1.01 (0.65,1.59) <i>p</i> = 0.96          | 0.54 (0.24,1.21) <i>p</i> = 0.14        |
| Major GI bleeding                               | Female | 0.00 (0.00, NE) <i>p</i> = 0.99                                           | 1.00-reference                            | 0.45 (0.16, 1.21) <i>p</i> = 0.11    | 0.60 (0.19,1.88) <i>p</i> = 0.38          | 0.25 (0.03,1.95) <i>p</i> = 0.19        |
|                                                 | Male   | 0.00 (0.00, NE) <i>p</i> = 0.99                                           | 1.00-reference                            | 1.86 (0.61, 5.59) <i>p</i> = 0.27    | 1.34 (0.36,4.99) <i>p</i> = 0.66          | 1.52 (0.28,8.30) <i>p</i> = 0.63        |
| Intracranial haemorrhage                        | Female | 0.00 (0.00, NE) <i>p</i> = 0.99                                           | 1.00-reference                            | 1.09 (0.24, 4.88) <i>p</i> = 0.91    | 1.10 (0.18,6.57) <i>p</i> = 0.92          | 0.93 (0.10,8.90) <i>p</i> = 0.95        |
|                                                 | Male   | 0.00 (0.00, NE) <i>p</i> = 0.99                                           | 1.00-reference                            | 1.23 (0.39, 3.93) <i>p</i> = 0.72    | 0.80 (0.18,3.58) <i>p</i> = 0.77          | 0.76 (0.09,6.79) <i>p</i> = 0.80        |
| Any stroke or systemic embolism                 | Female | 1.31 (0.17,9.93) <i>p</i> = 0.79                                          | 1.00-reference                            | 1.37 (0.72, 2.59) <i>p</i> = 0.34    | 0.99 (0.43,2.26) <i>p</i> = 0.98          | 0.74 (0.25,2.22) <i>p</i> = 0.59        |
|                                                 | Male   | 0.00 (0.00, NE) <i>p</i> = 0.99                                           | 1.00-reference                            | 1.55 (0.66, 3.63) <i>p</i> = 0.31    | 1.22 (0.44,3.37) <i>p</i> = 0.70          | 3.48 (1.26,9.60) <i>p</i> = 0.0160      |
| Ischaemic stroke                                | Female | 1.64 (0.21,12.60) <i>p</i> = 0.64                                         | 1.00-reference                            | 1.23 (0.59, 2.56) <i>p</i> = 0.58    | 0.41 (0.12,1.45) <i>p</i> = 0.17          | 0.69 (0.20,2.45) <i>p</i> = 0.57        |
|                                                 | Male   | 0.00 (0.00, NE) <i>p</i> = 0.99                                           | 1.00-reference                            | 1.38 (0.50, 3.84) <i>p</i> = 0.53    | 1.07 (0.31,3.70) <i>p</i> = 0.92          | 3.04 (0.88,10.50) <i>p</i> = 0.08       |
| Haemorrhagic stroke                             | Female | 0.00 (0.00, NE) <i>p</i> = 1.00                                           | 1.00-reference                            | 1.63 (0.15, 17.99) <i>p</i> = 0.69   | 1.64 (0.10,26.22) <i>p</i> = 0.73         | 0.00 (0.00, NE) <i>p</i> = 1.00         |
|                                                 | Male   | 0.00 (0.00, NE) <i>p</i> = 0.99                                           | 1.00-reference                            | 0.99 (0.18, 5.40) <i>p</i> = 0.99    | 1.61 (0.27,9.65) <i>p</i> = 0.60          | 1.52 (0.14,16.81) <i>p</i> = 0.73       |
| Myocardial infarction                           | Female | 0.00 (0.00, NE) <i>p</i> = 0.99                                           | 1.00-reference                            | 1.10 (0.38, 3.14) <i>p</i> = 0.87    | 1.37 (0.42,4.48) <i>p</i> = 0.61          | 2.32 (0.71,7.60) <i>p</i> = 0.16        |
|                                                 | Male   | 0.00 (0.00, NE) <i>p</i> = 0.99                                           | 1.00-reference                            | 1.70 (0.73, 3.94) <i>p</i> = 0.22    | 1.07 (0.38,3.06) <i>p</i> = 0.89          | 0.43 (0.05,3.53) <i>p</i> = 0.44        |
| Cardiovascular mortality (sensitivity analysis) | Female | 1.19 (0.29,4.96) <i>p</i> = 0.81                                          | 1.00-reference                            | 0.65 (0.39, 1.08) <i>p</i> = 0.09    | 0.70 (0.37,1.30) <i>p</i> = 0.26          | 0.50 (0.21,1.20) <i>p</i> = 0.12        |
|                                                 | Male   | 12.11 (4.70,31.22) <i>p</i> < 0.0001                                      | 1.00-reference                            | 0.89 (0.57, 1.39) <i>p</i> = 0.60    | 0.68 (0.38,1.20) <i>p</i> = 0.18          | 0.91 (0.43,1.92) <i>p</i> = 0.80        |
| All-cause mortality                             | Female | 1.81 (0.84,3.93) <i>p</i> = 0.13                                          | 1.00-reference                            | 0.58 (0.41, 0.82) <i>p</i> = 0.0023  | 0.52 (0.33,0.82) <i>p</i> = 0.0050        | 0.66 (0.39,1.10) <i>p</i> = 0.11        |
|                                                 | Male   | 9.92 (4.95,19.90) <i>p</i> < 0.0001                                       | 1.00-reference                            | 0.78 (0.57, 1.06) <i>p</i> = 0.11    | 0.62 (0.42,0.92) <i>p</i> = 0.0184        | 0.81 (0.48,1.37) <i>p</i> = 0.44        |

**Table S8.** Outcomes at 1-year split by gender for BMI categories (adjusted for eGFR and CHA<sub>2</sub>DS<sub>2</sub>-VASc).

| Event Type                      | Gender                                | BMI [kg/m <sup>2</sup> ]-HR Compared with Normal Weight BMI ≥18.5 and <25 |                                              |                                        |                                               |                                            |
|---------------------------------|---------------------------------------|---------------------------------------------------------------------------|----------------------------------------------|----------------------------------------|-----------------------------------------------|--------------------------------------------|
|                                 | N (Total Events;<br>Events Per Group) | Underweight<br><18.5 kg/m <sup>2</sup>                                    | Normal Weight<br>≥18.5–<25 kg/m <sup>2</sup> | Overweigh ≥25–<30<br>kg/m <sup>2</sup> | Class 1 Obesity ≥30–<br><35 kg/m <sup>2</sup> | Class 2+3 Obesity<br>≥35 kg/m <sup>2</sup> |
| Major bleeding                  | Female (62;<br>0, 27, 22, 9, 4)       | 0.00 (0.00, NE) <i>p</i> =<br>0.98                                        | 1.00-reference                               | 0.69 (0.38, 1.23) <i>p</i> =<br>0.20   | 0.64 (0.29,1.41) <i>p</i> =<br>0.27           | 0.59 (0.19,1.83) <i>p</i> =<br>0.36        |
|                                 | Male (70;<br>0, 14, 35, 13, 3)        | 0.00 (0.00, NE) <i>p</i> =<br>0.98                                        | 1.00-reference                               | 1.52 (0.80, 2.92) <i>p</i> =<br>0.20   | 1.45 (0.65,3.26) <i>p</i> =<br>0.37           | 1.39 (0.37,5.23) <i>p</i> =<br>0.63        |
| Major or CRNM bleeding          | Female (129;<br>4, 49, 37, 21, 14)    | 1.39 (0.50,3.88) <i>p</i> =<br>0.53                                       | 1.00-reference                               | 0.66 (0.42, 1.03) <i>p</i> =<br>0.07   | 0.75 (0.42,1.32) <i>p</i> =<br>0.31           | 1.16 (0.58,2.29) <i>p</i> =<br>0.68        |
|                                 | Male (164;<br>1, 39, 73, 37, 7)       | 1.37 (0.19,10.04) <i>p</i> =<br>= 0.75                                    | 1.00-reference                               | 1.05 (0.70, 1.58) <i>p</i> =<br>0.8100 | 1.26 (0.77,2.07) <i>p</i> =<br>0.36           | 0.84 (0.34,2.10) <i>p</i> =<br>0.71        |
| Major GI bleeding               | Female (22;<br>0, 11, 6, 4, 1)        | 0.00 (0.00, NE) <i>p</i> =<br>0.99                                        | 1.00-reference                               | 0.52 (0.19, 1.44) <i>p</i> =<br>0.21   | 0.81 (0.24,2.74) <i>p</i> =<br>0.74           | 0.47 (0.05,4.07) <i>p</i> =<br>0.49        |
|                                 | Male (2;<br>0, 4, 15, 5, 2)           | 0.00 (0.00, NE) <i>p</i> =<br>0.99                                        | 1.00-reference                               | 2.34 (0.77, 7.15) <i>p</i> =<br>0.14   | 2.10 (0.54,8.22) <i>p</i> =<br>0.29           | 3.83 (0.63,23.23) <i>p</i> =<br>0.14       |
| Intracranial haemorrhage        | Female (10;<br>0, 3, 4, 2, 1)         | 0.00 (0.00, NE) <i>p</i> =<br>0.99                                        | 1.00-reference                               | 0.79 (0.16, 4.03) <i>p</i> =<br>0.78   | 1.01 (0.15,6.69) <i>p</i> =<br>0.99           | 0.78 (0.06,10.45) <i>p</i> =<br>0.85       |
|                                 | Male (20;<br>0, 4, 10, 3, 1)          | 0.00 (0.00, NE) <i>p</i> =<br>0.99                                        | 1.00-reference                               | 1.75 (0.47, 6.48) <i>p</i> =<br>0.40   | 1.16 (0.22,6.21) <i>p</i> =<br>0.86           | 1.35 (0.12,15.68) <i>p</i> =<br>0.81       |
| Any stroke or systemic embolism | Female (55;<br>1, 15, 25, 9, 4)       | 1.39 (0.18,10.65) <i>p</i> =<br>= 0.75                                    | 1.00-reference                               | 1.29 (0.64, 2.60) <i>p</i> =<br>0.48   | 1.12 (0.46,2.73) <i>p</i> =<br>0.80           | 0.72 (0.18,2.80) <i>p</i> =<br>0.63        |
|                                 | Male (48;<br>0, 7, 22, 8, 8)          | 0.00 (0.00, NE) <i>p</i> =<br>0.99                                        | 1.00-reference                               | 1.69 (0.71, 4.01) <i>p</i> =<br>0.24   | 1.37 (0.46,4.05) <i>p</i> =<br>0.57           | 5.91 (1.90,18.36) <i>p</i> =<br>0.0021     |
| Ischaemic stroke                | Female (38;<br>1, 12, 18, 3, 3)       | 1.93 (0.25,15.15) <i>p</i> =<br>= 0.53                                    | 1.00-reference                               | 1.20 (0.54, 2.67) <i>p</i> =<br>0.66   | 0.42 (0.11, 1.60) <i>p</i> =<br>0.21          | 0.71 (0.16,3.08) <i>p</i> =<br>0.64        |
|                                 | Male (32;<br>0, 5, 14, 5, 5)          | 0.00 (0.00, NE) <i>p</i> =<br>0.99                                        | 1.00-reference                               | 1.36 (0.48, 3.88) <i>p</i> =<br>0.56   | 0.93 (0.24,3.65) <i>p</i> =<br>0.92           | 4.00 (0.97,16.51) <i>p</i> =<br>0.06       |
| Haemorrhagic stroke             | Female (4;<br>0, 1, 2, 1, 0)          | 0.00 (0.00, NE) <i>p</i> =<br>1.00                                        | 1.00-reference                               | 1.61 (0.15, 17.75) <i>p</i> =<br>0.70  | 1.57 (0.10,25.34) <i>p</i> =<br>0.75          | 0.00 (0.00, NE) <i>p</i> =<br>1.00         |

|                                                    |                                      |                                    |                |                                   |                                  |                                  |
|----------------------------------------------------|--------------------------------------|------------------------------------|----------------|-----------------------------------|----------------------------------|----------------------------------|
| Myocardial infarction                              | Male (10;<br>0, 2, 4, 3, 1)          | 0.00 (0.00, NE) $p =$<br>0.99      | 1.00-reference | 1.05 (0.19, 5.75) $p =$<br>0.96   | 1.84 (0.30, 11.23) $p =$<br>0.51 | 2.00 (0.17, 23.47) $p =$<br>0.58 |
|                                                    | Female (25;<br>0, 6, 8, 5, 5)        | 0.00 (0.00, NE) $p =$<br>0.99      | 1.00-reference | 1.10 (0.38, 3.21) $p =$<br>0.86   | 1.45 (0.42, 4.98) $p =$<br>0.55  | 2.47 (0.59, 10.27) $p =$<br>0.21 |
|                                                    | Male (41;<br>0, 7, 24, 7, 1)         | 0.00 (0.00, NE) $p =$<br>0.99      | 1.00-reference | 2.02 (0.81, 5.05) $p =$<br>0.13   | 1.30 (0.40, 4.26) $p =$<br>0.66  | 0.77 (0.08, 7.07) $p =$<br>0.82  |
| Cardiovascular mortality<br>(sensitivity analysis) | Female (85;<br>2, 33, 26, 14, 6)     | 1.02 (0.24, 4.30) $p =$<br>0.98    | 1.00-reference | 0.75 (0.43, 1.32) $p =$<br>0.32   | 1.10 (0.56, 2.14) $p =$<br>0.78  | 1.05 (0.38, 2.88) $p =$<br>0.92  |
|                                                    | Male (121;<br>5, 30, 54, 19, 9)      | 7.67 (2.92, 20.12) $p$<br>< 0.0001 | 1.00-reference | 1.13 (0.71, 1.80) $p =$<br>0.62   | 0.88 (0.46, 1.66) $p =$<br>0.68  | 1.91 (0.82, 4.45) $p =$<br>0.14  |
| All-cause mortality                                | Female (187;<br>7, 76, 54, 24, 18 *) | 1.51 (0.69, 3.30) $p =$<br>0.30    | 1.00-reference | 0.65 (0.45, 0.95) $p =$<br>0.0250 | 0.72 (0.44, 1.18) $p =$<br>0.19  | 1.39 (0.78, 2.48) $p =$<br>0.27  |
|                                                    | Male (254;<br>9, 67, 106, 39, 18 *)  | 6.37 (3.15, 12.89) $p$<br>< 0.0001 | 1.00-reference | 0.98 (0.71, 1.35) $p =$<br>0.90   | 0.83 (0.54, 1.29) $p =$<br>0.42  | 1.79 (0.99, 3.23) $p =$<br>0.05  |

\* 8 deaths at females and 15 deaths at males with missing BMI.

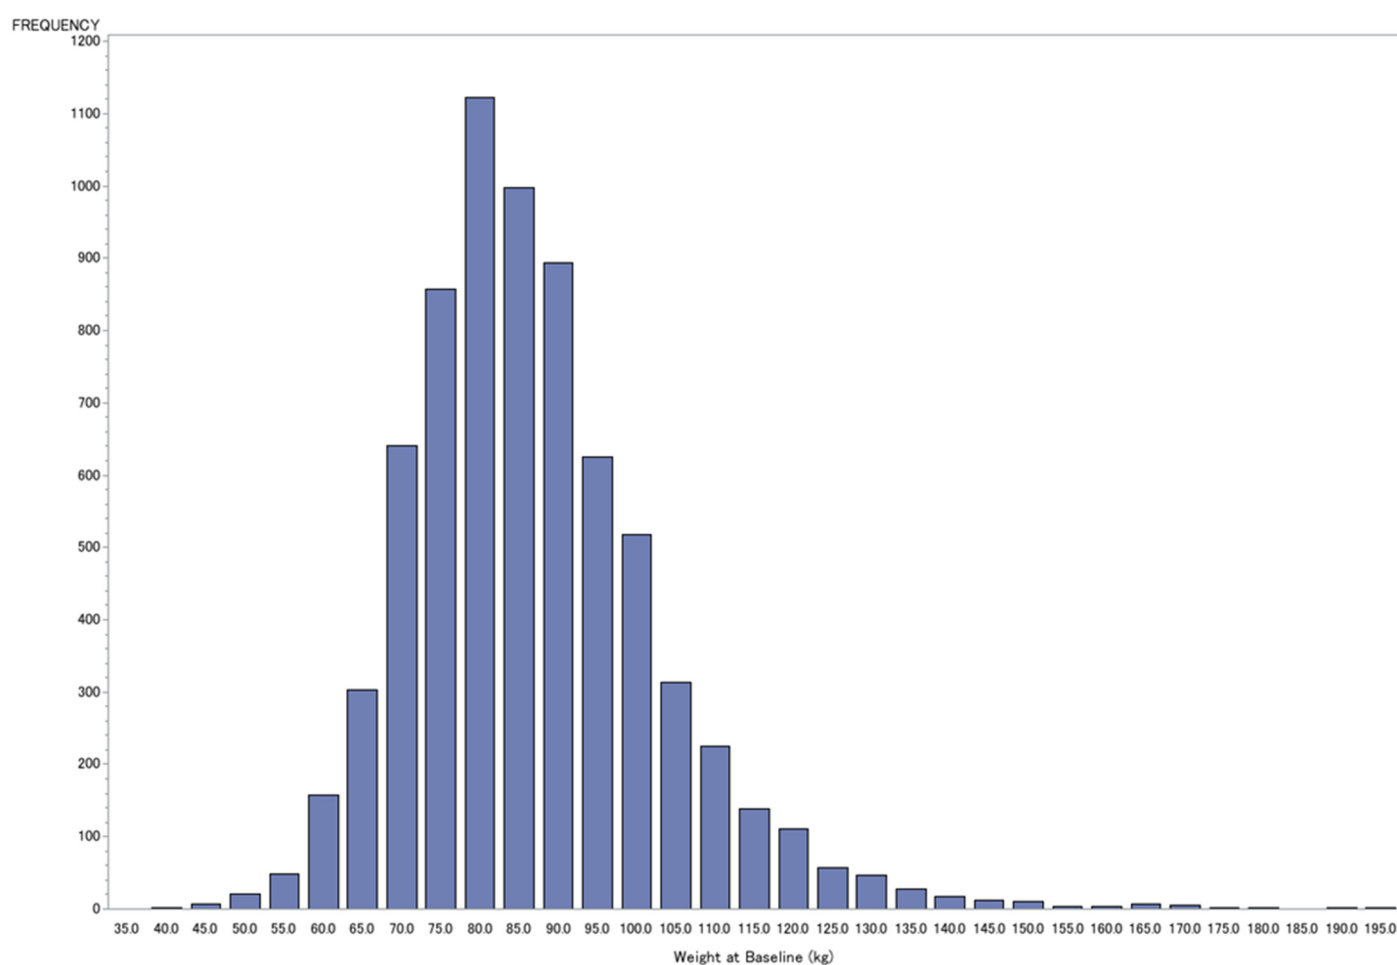

(a) Frequency males across the range of body weight at baseline



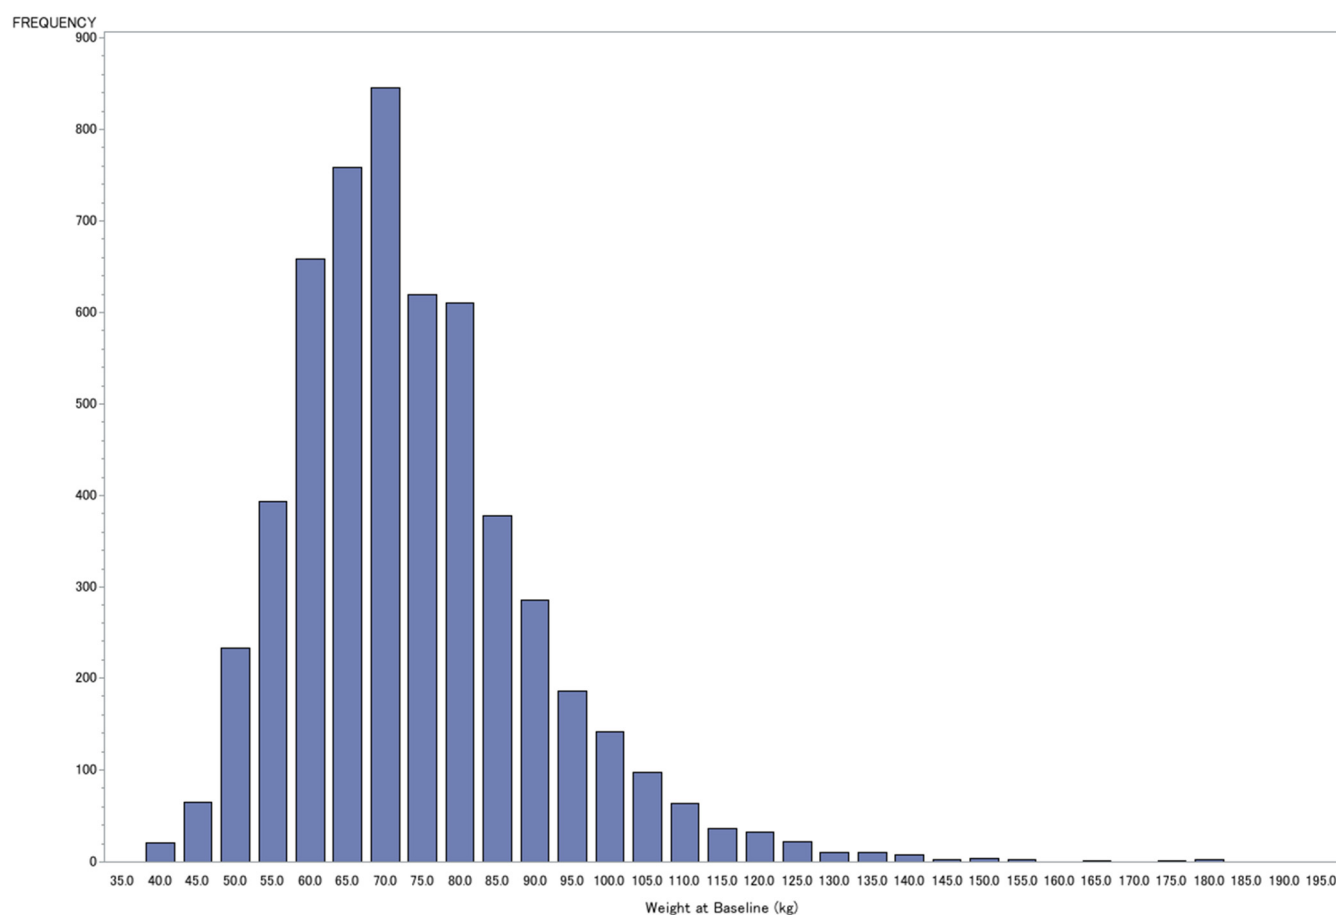

(b) Frequency females across the range of body weight at baseline

**Figure S1.** Frequency of patients (split by male and female) across the range of body weight at baseline. (a) Frequency males across the range of body weight at baseline, (b) Frequency females across the range of body weight at baseline.

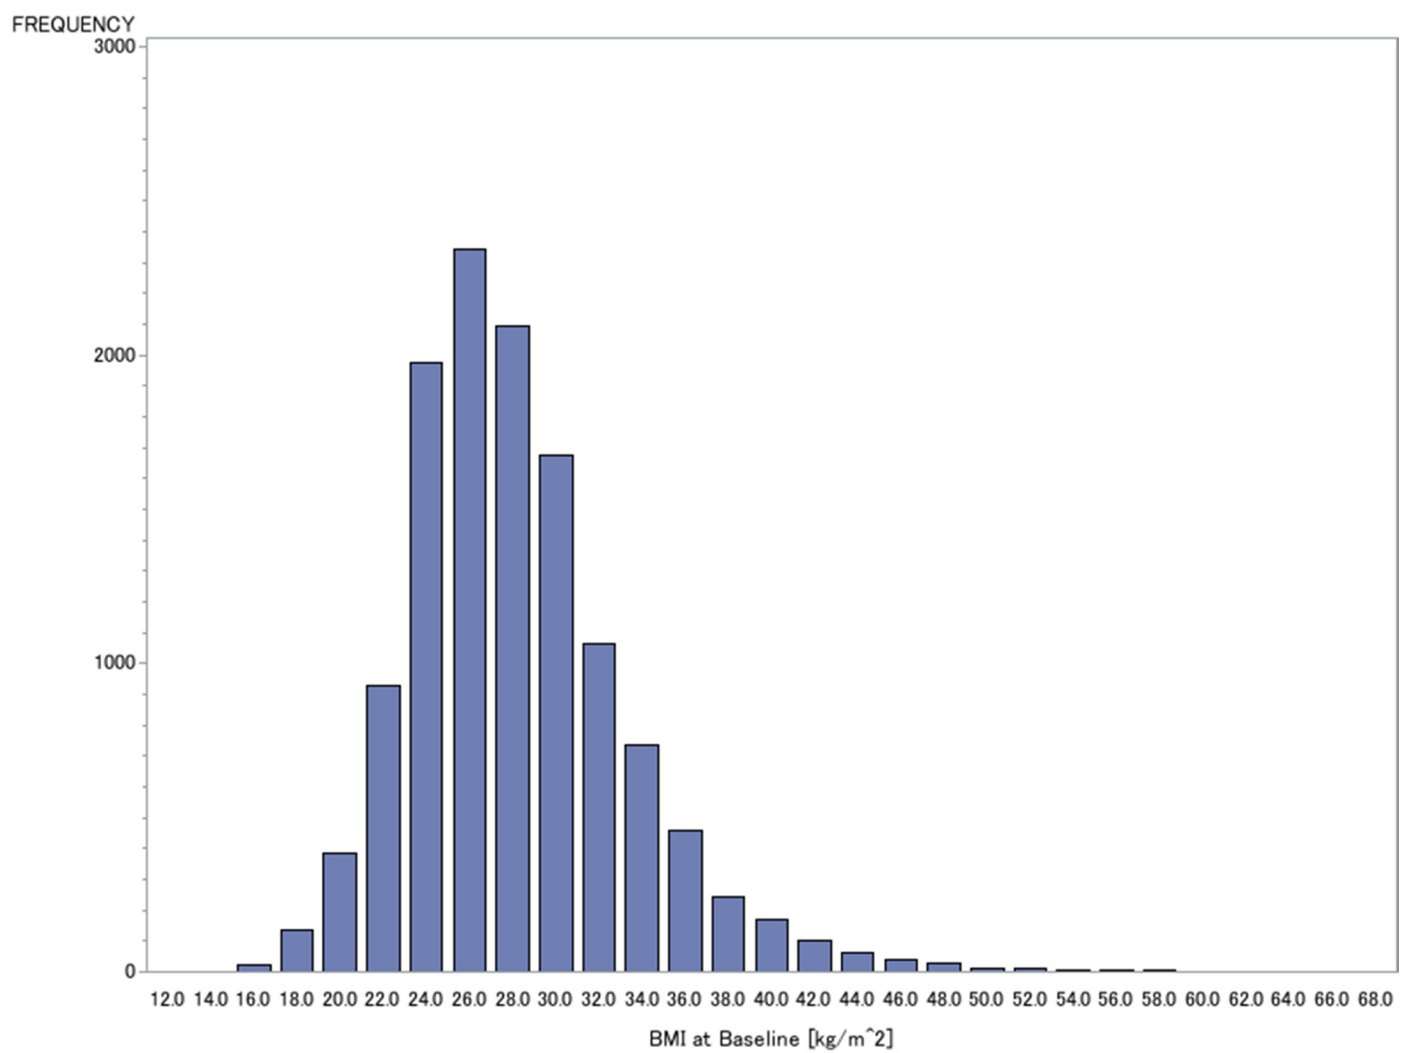

**Figure S2.** Frequency of patients across the range of BMI at baseline.

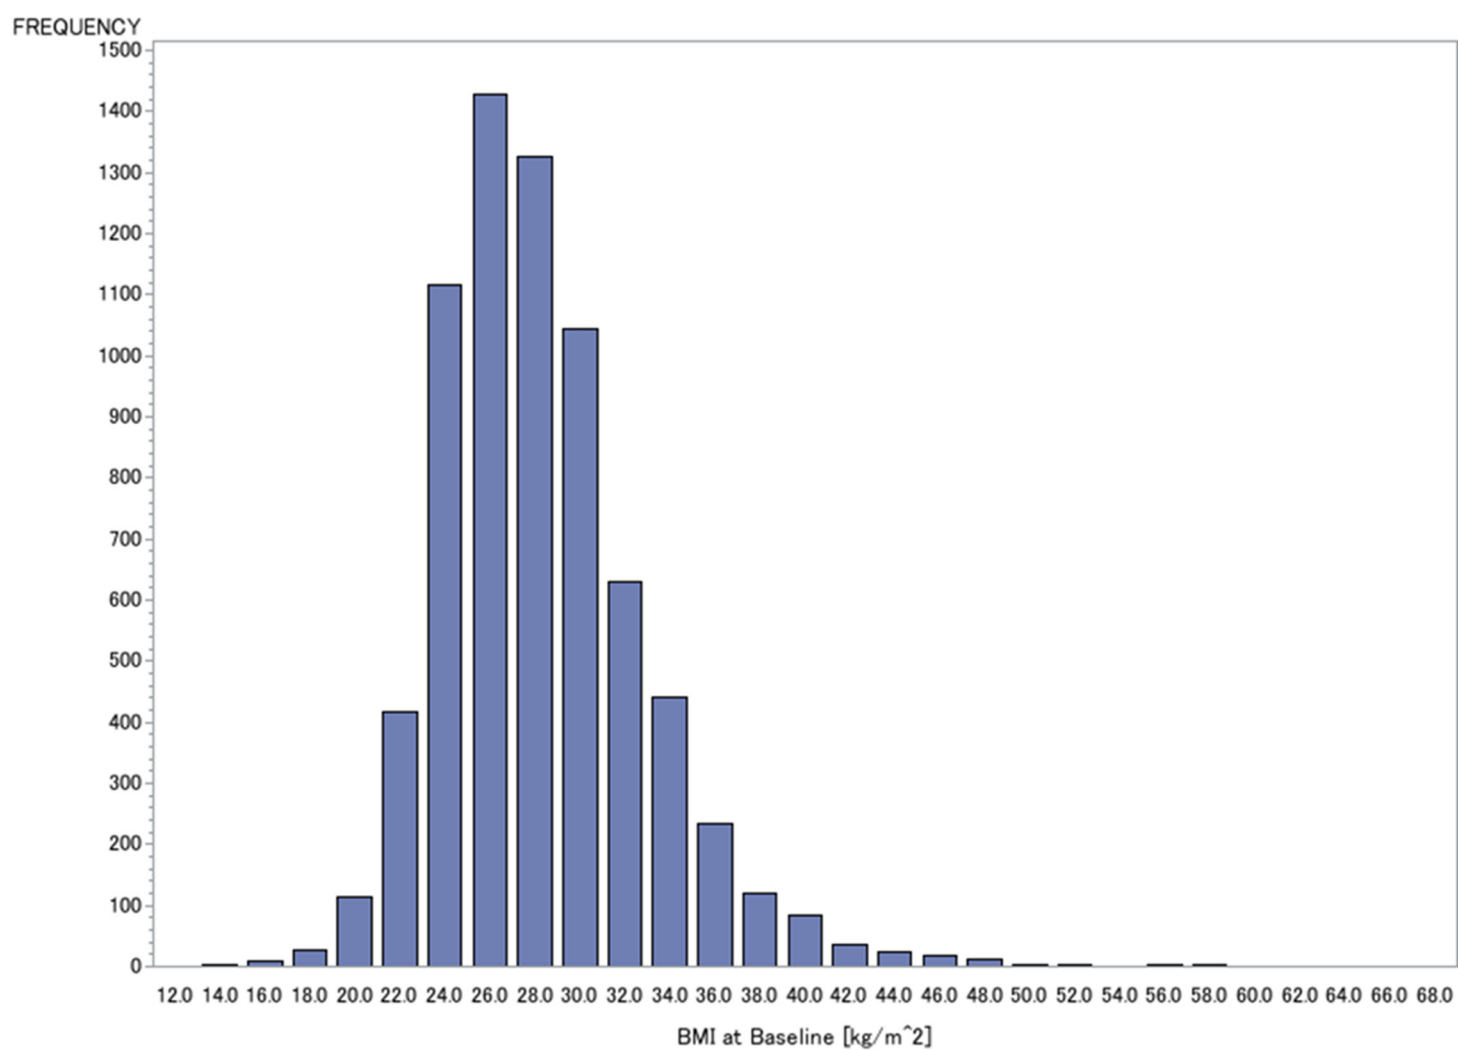

(a) Frequency males across the range of BMI at baseline

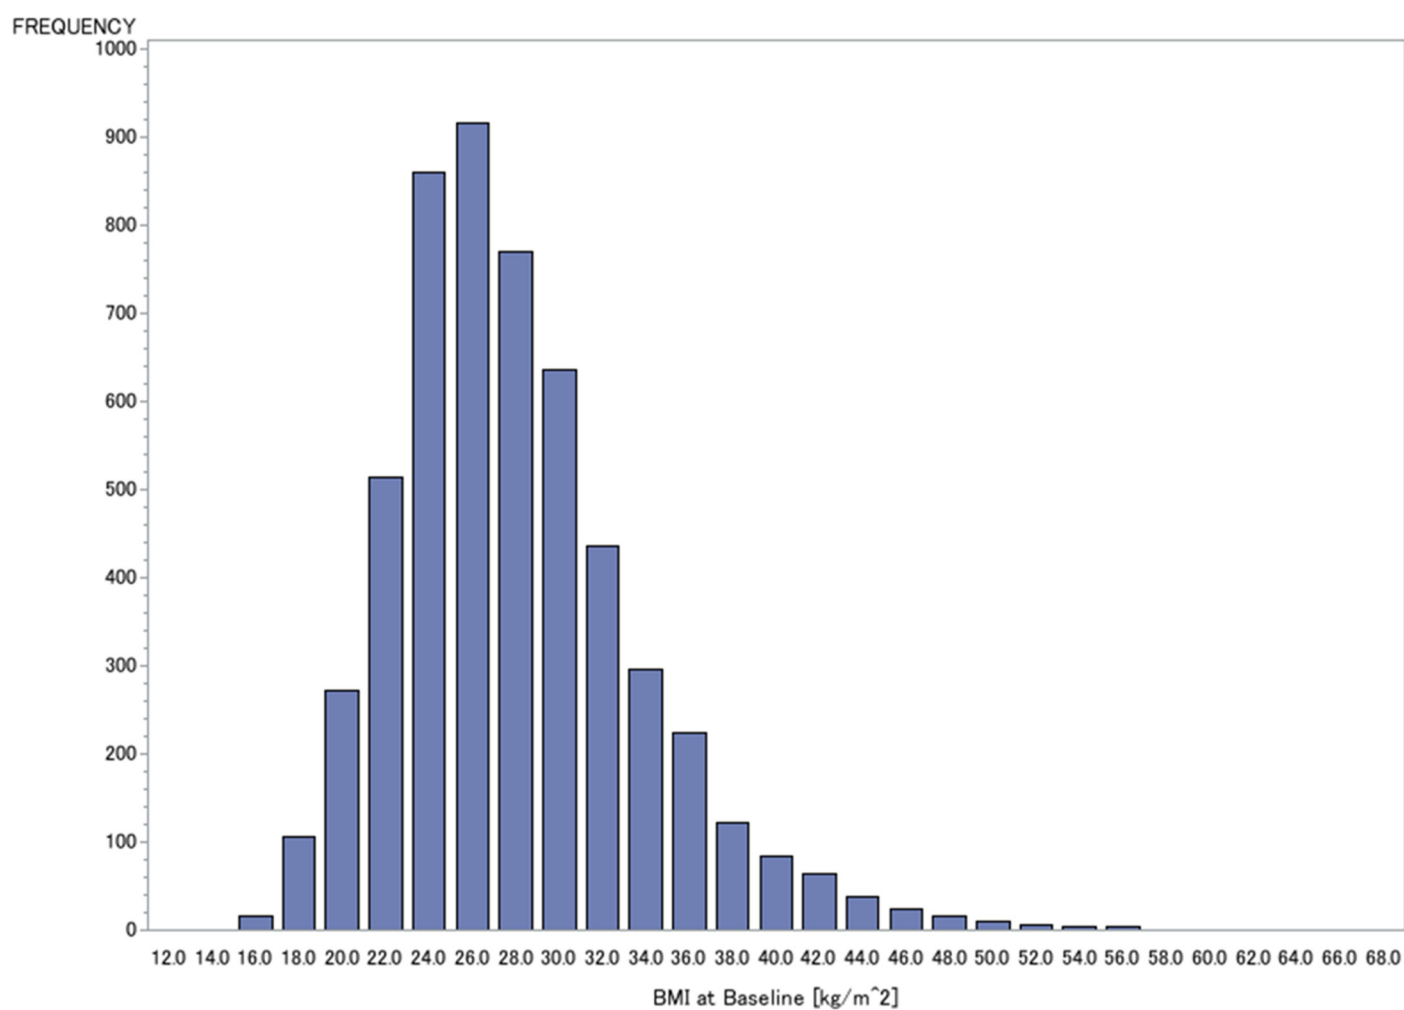

(b) Frequency females across the range of BMI at baseline

**Figure S3.** Frequency of patients (split by male and female) across the range of BMI at baseline. (a) Frequency males across the range of BMI at baseline, (b) Frequency females across the range of BMI at baseline.
